# Supplementary material for: Factors Influencing Gaseous Emissions in Constructed Wetlands: A Meta-Analysis and Systematic Review
Source: MDPI journal article supplement (doi:10.3390/ijerph20053876), 2023-02-22
Supplement: s1 [file s1]

**Figure S1.** The flow diagram of literature search and selection process.

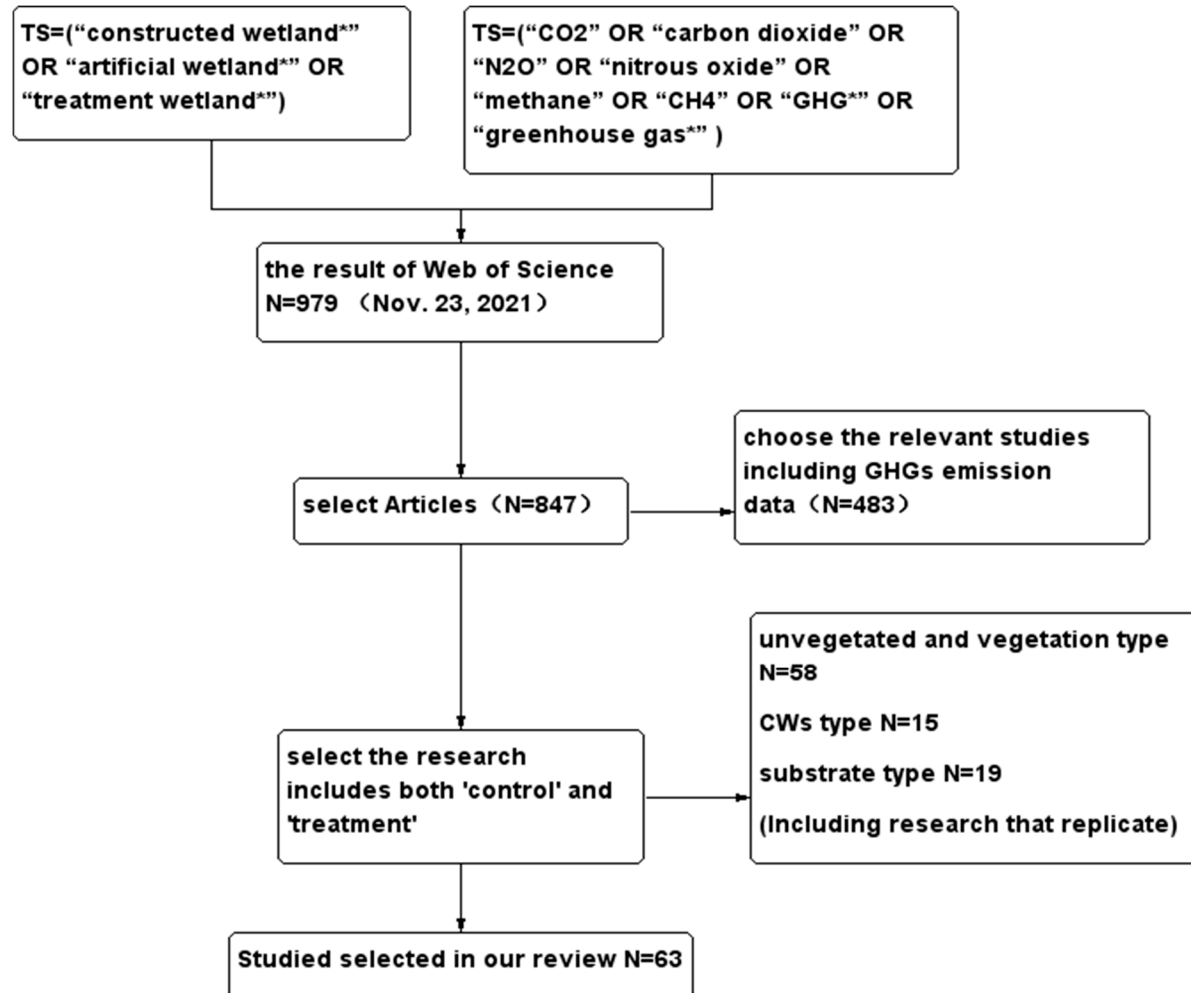

**Table S1.** CH<sub>4</sub> and N<sub>2</sub>O emission from different substrate- amended CWs.

| CWs type | Substrate type                | Wastewater type          | Vegetation                  | CH <sub>4</sub> flux (mg/m <sup>2</sup> /h) | N <sub>2</sub> O flux ((mg/m <sup>2</sup> /h)) | Reference |
|----------|-------------------------------|--------------------------|-----------------------------|---------------------------------------------|------------------------------------------------|-----------|
| FWS      | No treatment                  | Agricultural runoff      | <i>Holcus lanatus</i> grass | 27.0                                        |                                                | [37]      |
|          | Iron ochre                    | --                       | --                          | 9.0                                         |                                                |           |
|          | Gypsum                        | --                       | --                          | 28.0                                        |                                                |           |
| VSSF     | Gravel                        | Synthetic wastewater     | <i>C. alternifolius</i>     | 229.2                                       |                                                | [35]      |
|          | Manganese ore                 | --                       | --                          | 125.4                                       |                                                |           |
| VSSF     | Quartz sand, anaerobic sludge | Synthetic wastewater     | <i>I. pseudacorus</i>       | 0.048 - 0.051                               |                                                | [36]      |
|          | Iron ore-amended              | --                       | --                          | 0.059 - 0.061                               |                                                |           |
| VSSF     | Gravel, quartz sand           | Artificial wastewater    | <i>I. pseudacorus</i>       | 0.06                                        | 0.003                                          | [39]      |
|          | Iron ore-amended              | --                       | --                          | 0.05                                        | 0.004                                          |           |
|          | Manganese ore-amended         | --                       | --                          | 0.00                                        | 0.003                                          |           |
| VSSF     | Gravel, sand                  | Synthetic wastewater     | <i>I. pseudacorus</i>       | 17.08                                       | 0.10                                           | [38]      |
|          | Walnut shell-amended          | --                       | --                          | 252.30                                      | 0.07                                           |           |
|          | Manganese ore-amended         | --                       | --                          | 2.00                                        | 0.14                                           |           |
|          | Activated alumina-amended     | --                       | --                          | 6.43                                        | 0.20                                           |           |
| VSSF     | Sand, gravel, coarse gravel   | Synthetic wastewater     | <i>I. pseudacorus</i>       | 0.154                                       |                                                | [118]     |
|          | Biological ceramic-amended    | --                       | --                          | 0.157                                       |                                                |           |
|          | Magnetite-amended             | --                       | --                          | 0.186                                       |                                                |           |
|          | Sand, gravel, coarse gravel   | Diluted swine wastewater | --                          | 0.043                                       |                                                |           |
|          | Biological ceramic-amended    | --                       | --                          | 0.105                                       |                                                |           |
|          | Magnetite-amended             | --                       | --                          | 0.095                                       |                                                |           |

Note: The symbol "--" indicates the same content as the line above.

**Table S2.** NH<sub>3</sub> volatilization from CWs and ponds is affected by several factors.

| CWs type | Wastewater | TAN and/or TN (mg/L) | Plant                  | Temperature °C | pH  | NH <sub>3</sub> (mg/m <sup>2</sup> /d or % of TN) | Reference |
|----------|------------|----------------------|------------------------|----------------|-----|---------------------------------------------------|-----------|
| FWS CWs  | Swine      | 223                  | <i>T. latifolia</i>    |                | 7.0 | 816.0                                             | [100]     |
|          |            | 117                  |                        |                | 7.1 | 48.0                                              |           |
|          |            | 113                  |                        |                | 7.3 | 216.0                                             |           |
|          |            | 102                  |                        |                | 7.1 | 504.0                                             |           |
| Marsh    | Swine      | 162                  | <i>T. latifolia</i>    | 24.5           | 7.0 | 360.0                                             | [12]      |
| Marsh    |            | 60                   |                        | 20.2           | 7.1 | 240.0                                             |           |
| Pond     |            | 59                   |                        | 26.9           | 7.4 | 1824.0                                            |           |
| Marsh    |            | 6                    |                        | 23.5           | 6.6 | 96.0                                              |           |
| Pond     |            | 5                    |                        | 26.4           | 6.9 | 120.0                                             |           |
| Marsh    |            | 4                    |                        | 26.5           | 6.6 | 48.0                                              |           |
| FWS CWs  | Dairy      | 254                  | <i>T. latifolia</i>    |                |     | 130.0                                             | [11]      |
|          |            | 229                  |                        |                |     | 205.0                                             |           |
|          |            | 254                  |                        |                |     | 518.0                                             |           |
|          |            | 258                  |                        |                |     | 251.0                                             |           |
| SSF CWs  |            | 291                  |                        |                |     | 15.0                                              |           |
|          |            | 244                  |                        |                |     | 24.0                                              |           |
|          |            | 285                  |                        |                |     | 73.0                                              |           |
|          |            | 297                  |                        |                |     | 99.0                                              |           |
| FWS CWs  | Swine      | 136.4                | <i>T. angustifolia</i> | 13.7           | 7.5 | 10.5% (of TN)                                     | [101]     |
|          |            | 402.0                |                        | 20             | 7.2 | 12.3% (of TN)                                     |           |
|          |            | 549.9                |                        | 16.9           | 7.3 | 20.4% (of TN)                                     |           |

|                       |           |            |                                                             |           |                                                                                  |       |
|-----------------------|-----------|------------|-------------------------------------------------------------|-----------|----------------------------------------------------------------------------------|-------|
| CW microcosm          | Swine     | 213.5 (TN) | Without<br><i>A. philoxeroides</i><br><i>M. aquaticum</i>   | 22.7-35.8 | 224.2<br>77.8<br>69.9                                                            | [119] |
| CW microcosm          | Synthetic | 336        | One species<br>Two species<br>Three species<br>Four species | 18.7      | 0.8<br>0.7<br>0.2<br>0.47                                                        | [105] |
| Floating CW microcosm | Synthetic | 336        | One species<br>Two species<br>Three species<br>Four species | 18.7      | 1.1<br>0.9<br>0.7<br>0.6                                                         | [63]  |
| HSSF bed              | Municipal | 63.6 (TN)  | <i>T. latifolia</i><br>dominate                             |           | 6.9 1.7% (of TN)<br>8.4 5.9% (of TN)<br>10.5 23.1% (of TN)<br>12.3 15.1% (of TN) | [99]  |

Note: SSF=subsurface flow (some data were extracted by GetData).
